# Supplementary material
Source: Elsevier journal article supplement (https://www.sciencedirect.com/science/article/pii/S001425652030206X)
Supplement: mmc1 [file S001425652030206X:mmc1.pdf]

## Apéndice A. Descripción de las variables

### **Datos demográficos y epidemiológicos**

Fecha de nacimiento

Fecha de ingreso

Edad (años)

Sexo

¿Trabajador sanitario?

Contacto conocido con paciente infectado

Adquisición nosocomial, en residencia o comunitaria

Fecha de inicio de los síntomas

Fecha de la realización de la prueba PCR SARS-CoV-2

Muestra para la prueba PCR SARS-CoV-2 (exudado faríngeo, esputo, lavado broncoalveolar)

Consumo excesivo de alcohol

Tabaquismo

Grado de dependencia

### **Comorbilidad**

Hipertensión

Dislipemia

Fibrilación auricular

Trastorno de ansiedad

Depresión

Obesidad

Enfermedad neurodegenerativa

Trasplante de órganos

Infarto de miocardio

Angina de pecho

Insuficiencia cardíaca

Enfermedad pulmonar obstructiva crónica

Bronquitis crónica

Asma

Accidente isquémico transitorio

Hemiplejía o paraplejía

Demencia

Enfermedad arterial periférica

Hepatopatía crónica

Enfermedad renal crónica

Cáncer (tumor sólido, leucemia, linfoma)

Diabetes con o sin daño de órgano diana

Enfermedad del tejido conectivo

Úlcera gástrica o duodenal

SIDA

Infección VIH conocida

S. de apnea obstructiva del sueño

Índice de comorbilidad de Charlson

## **Tratamiento habitual**

Metformina  
Inhibidores DPP-4  
GLP-1RA  
Inhibidores SGLT2  
Insulina  
Corticosteroides inhalados  
Inhibidores de la ECA  
Bloqueantes ARA2  
Ácido acetil-salicílico  
Anticoagulantes  
Terapias biológicas  
Hidroxicloroquina  
Inmunosupresores

## **Síntomas y signos en el momento del ingreso**

Tos  
Mialgias  
Ageusia  
Anosmia  
Astenia  
Anorexia  
Dolor faríngeo  
Cefalea  
Fiebre  
Disnea  
Diarrea  
Vómitos  
Dolor abdominal  
Taquipnea  
Tensión arterial sistólica y diastólica  
Frecuencia cardiaca  
Auscultación pulmonar

## **Pruebas de laboratorio y de imagen en el ingreso y a los 7 días (o en el momento del alta, o del ingreso en UCI)**

Saturación de oxígeno (pulsioximetría) y FiO<sub>2</sub>

### **Hemograma completo**

Hemoglobina  
Recuento de leucocitos  
Fórmula leucocitaria  
Recuento de plaquetas

### **Panel bioquímico**

Lactato-deshidrogenasa  
Aspartato aminotransferasa  
Alanina aminotransferasa  
Sodio

Potasio  
Glucemia basal  
Ferritina  
Lactato  
Troponina I  
Troponina T  
Interleukina-6  
Tiempo de protrombina y ratio  
Tiempo de tromboplastina parcial activada  
Dímero-D  
Procalcitonina

### **Gasometría arterial**

pH  
PO<sub>2</sub>  
PCO<sub>2</sub>  
PO<sub>2</sub>/FIO<sub>2</sub>

### **Pruebas de imagen**

Radiografía de tórax  
TC torácica  
Ecografía clínica pulmonar

### **Pruebas microbiológicas**

PCR gripe  
Antígenos de Legionella and Neumococo en orina  
Serología VIH

### **Tratamiento durante el ingreso (fechas de inicio y fin y dosis según casos)**

Lopinavir/ritonavir  
Interferón beta-1B  
Remdesivir  
Hidroxicloroquina  
Cloroquina  
Tocilizumab  
Baricitinib  
Corticosteroides sistémicos  
Antibióticos beta-lactámicos  
Antibióticos macrólidos  
Quinolonas  
Oseltamivir  
Beclometasona inhalada  
Inhibidores de la ECA  
Bloqueantes ARA2  
Anticoagulantes orales  
Heparina de bajo peso molecular  
Ácido acetil-salicílico  
Antiinflamatorios no esteroideos

## **Soporte ventilatorio**

Posición prono  
Ventilación mecánica no invasiva  
Ventilación mecánica invasiva  
Cánulas nasales de alto flujo

## **Complicaciones**

Neumonía bacteriana  
S. de distrés respiratorio del adulto  
Insuficiencia cardiaca  
Arritmias cardiacas  
Infarto de miocardio  
Miocarditis  
Convulsiones  
Ictus  
Shock  
Insuficiencia renal aguda  
Sepsis  
Coagulación intravascular diseminada  
Tromboembolismo venoso  
Síndrome de disfunción multiorgánica  
Enfermedad arterial periférica aguda

## **Datos sobre evolución**

Ingreso en UCI  
Causa y fecha del alta  
Reingreso  
Causa y fecha del alta tras reingreso  
*Exitus* y fecha del mismo
